# Supplementary material for: Nelfinavir Inhibits the TCF11/Nrf1-Mediated Proteasome Recovery Pathway in Multiple Myeloma
Source: Cancers (Basel). 2020 Apr 25;12(5):1065. doi: 10.3390/cancers12051065 (PMC7281108; doi:10.3390/cancers12051065)
Supplement: Supplementary file 1 [file cancers-12-01065-s001.pdf]

# Supplementary Materials: Nelfinavir Inhibits the TCF11/Nrf1-Mediated Proteasome Recovery Pathway in Multiple Myeloma

Dominika Fassmannová, František Sedlák, Jindřich Sedláček, Ivan Špička and Klára Grantz Šašková

## Supplementary Figures

Nelfinavir inhibits TCF11/Nrf1 proteolytic processing. HEK293 cells and OPM-2 and RPMI8226 MM cells were treated with 10  $\mu$ M or 20  $\mu$ M nelfinavir alone or in combination with 200 nM BTZ (HEK293 cells) or 20 nM BTZ (OPM-2, RPMI8226 cells) for 16 h. Cells were lysed and subjected to immunoblot analysis visualizing TCF11/Nrf1, DDI2 and tubulin as a loading control for HEK293 cells. Ponceau staining was used as a loading control for myeloma cells. Total Nrf1 expression was quantified from the integrated fluorescence of corresponding TCF11/Nrf1 bands normalized to tubulin or the Ponceau loading control. The processed (activated) form of Nrf1 was quantified as shown as [%]. Data from 6 (HEK293 cells) and 3 (OPM-2, RPMI8226 cells) independent experiments are shown. Immunoblots are shown below.

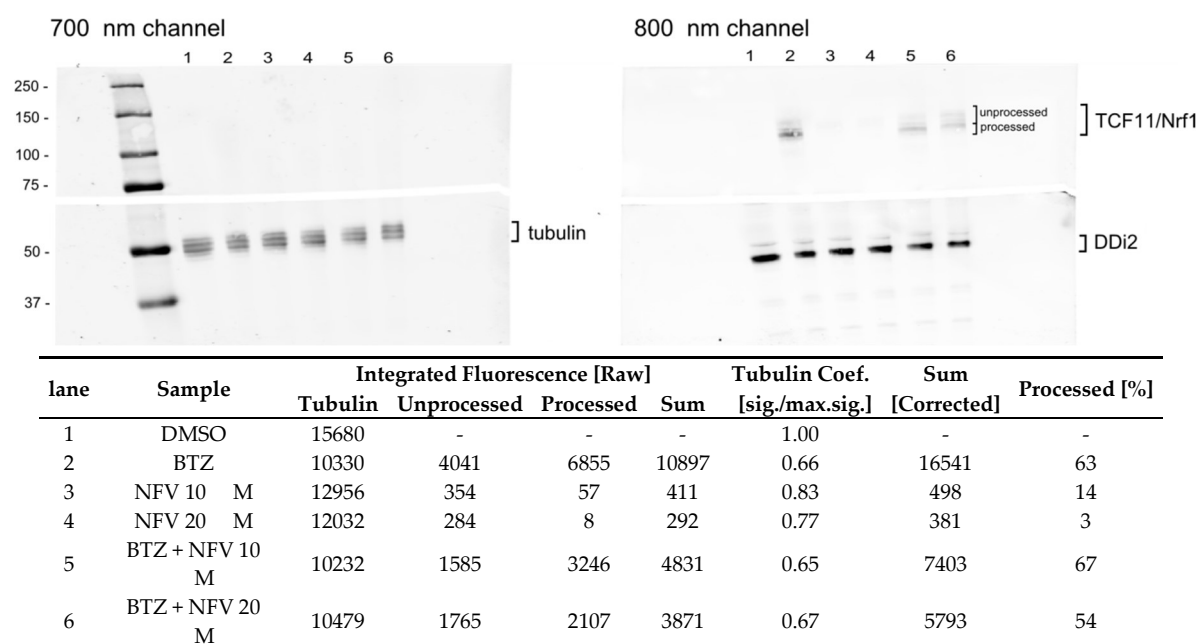

**Figure S1.** HEK293 cells were treated with 10  $\mu$ M or 20  $\mu$ M nelfinavir alone or in combination with 200 nM BTZ for 16 h. Cells were lysed and subjected to immunoblot analysis visualizing TCF11/Nrf1, DDI2 and tubulin as a loading control. First independent experiment.

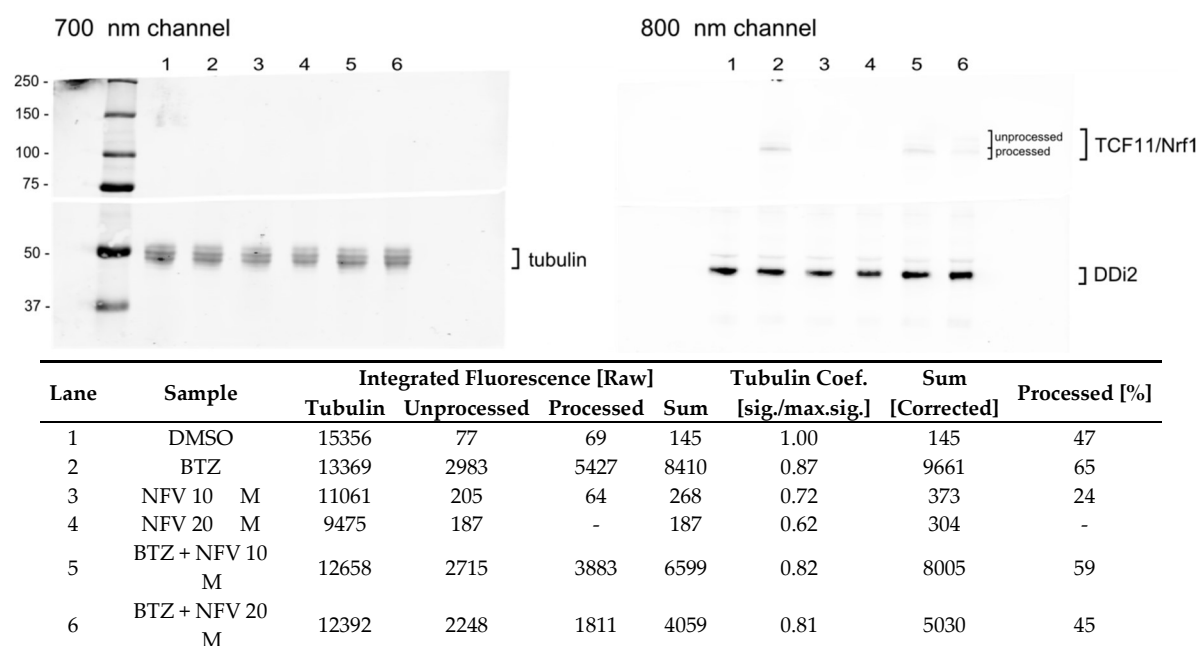

**Figure S2.** HEK293 cells were treated with 10  $\mu$ M or 20  $\mu$ M nelfinavir alone or in combination with 200 nM BTZ for 16 h. Cells were lysed and subjected to immunoblot analysis visualizing TCF11/Nrf1, DDi2 and tubulin as a loading control. Second independent experiment.

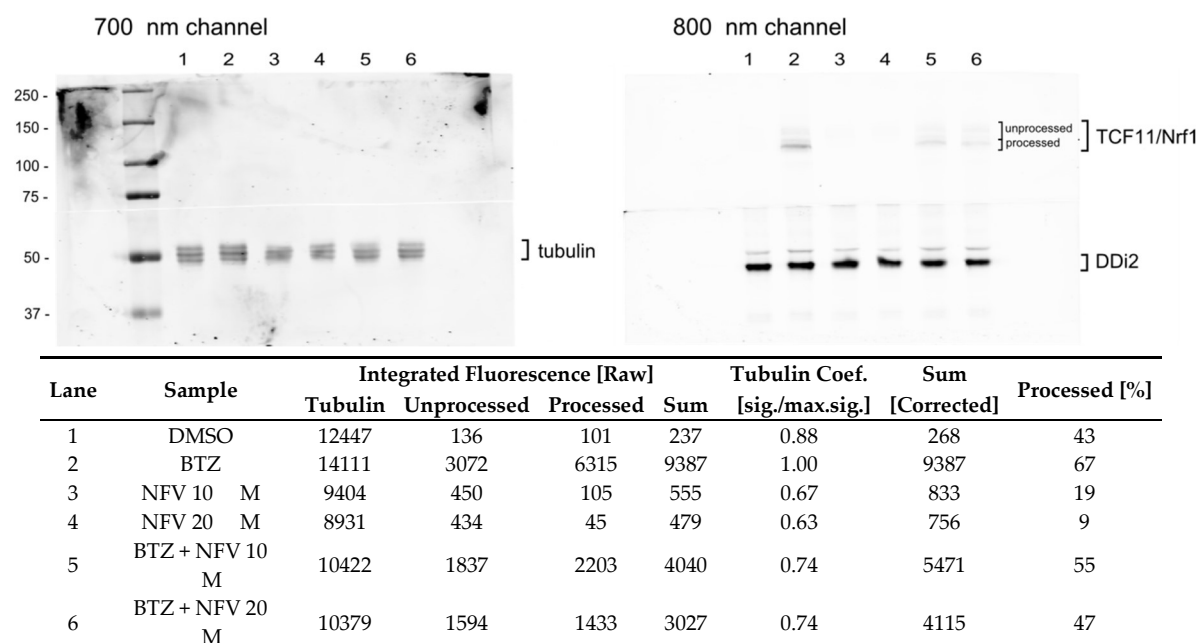

**Figure S3.** HEK293 cells were treated with 10  $\mu$ M or 20  $\mu$ M nelfinavir alone or in combination with 200 nM BTZ for 16 h. Cells were lysed and subjected to immunoblot analysis visualizing TCF11/Nrf1, DDi2 and tubulin as a loading control. Third independent experiment.

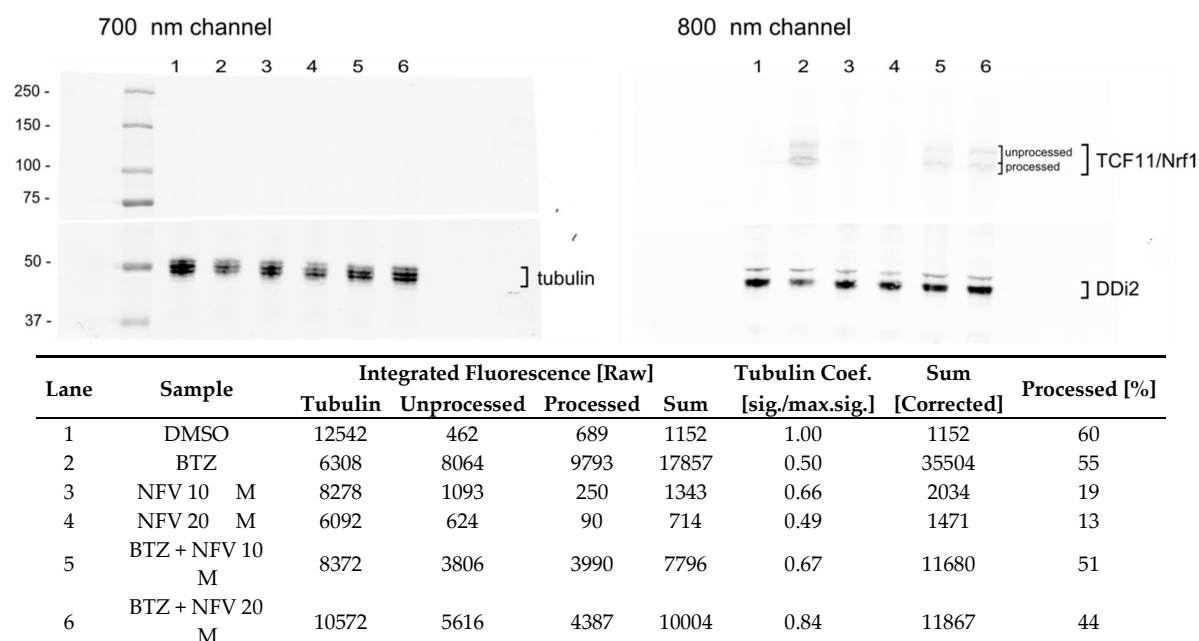

**Figure S4.** HEK293 cells were treated with 10  $\mu$ M or 20  $\mu$ M nelfinavir alone or in combination with 200 nM BTZ for 16 h. Cells were lysed and subjected to immunoblot analysis visualizing TCF11/Nrf1, DDi2 and tubulin as a loading control. Fourth independent experiment.

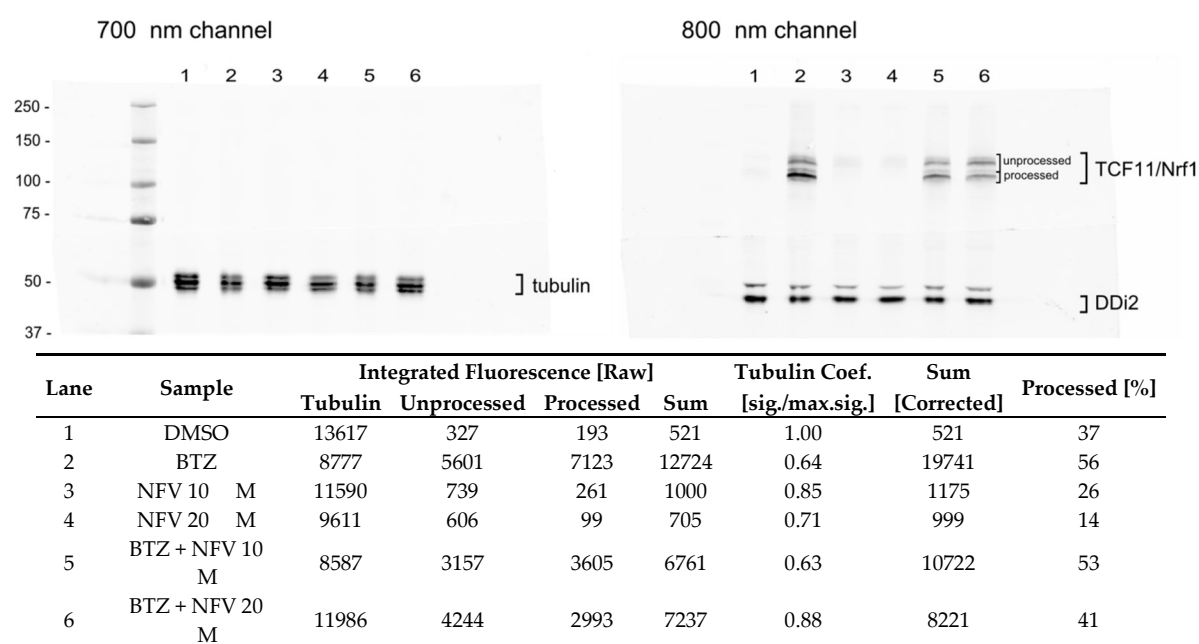

**Figure S5.** HEK293 cells were treated with 10  $\mu$ M or 20  $\mu$ M nelfinavir alone or in combination with 200 nM BTZ for 16 h. Cells were lysed and subjected to immunoblot analysis visualizing TCF11/Nrf1, DDi2 and tubulin as a loading control. Fifth independent experiment.

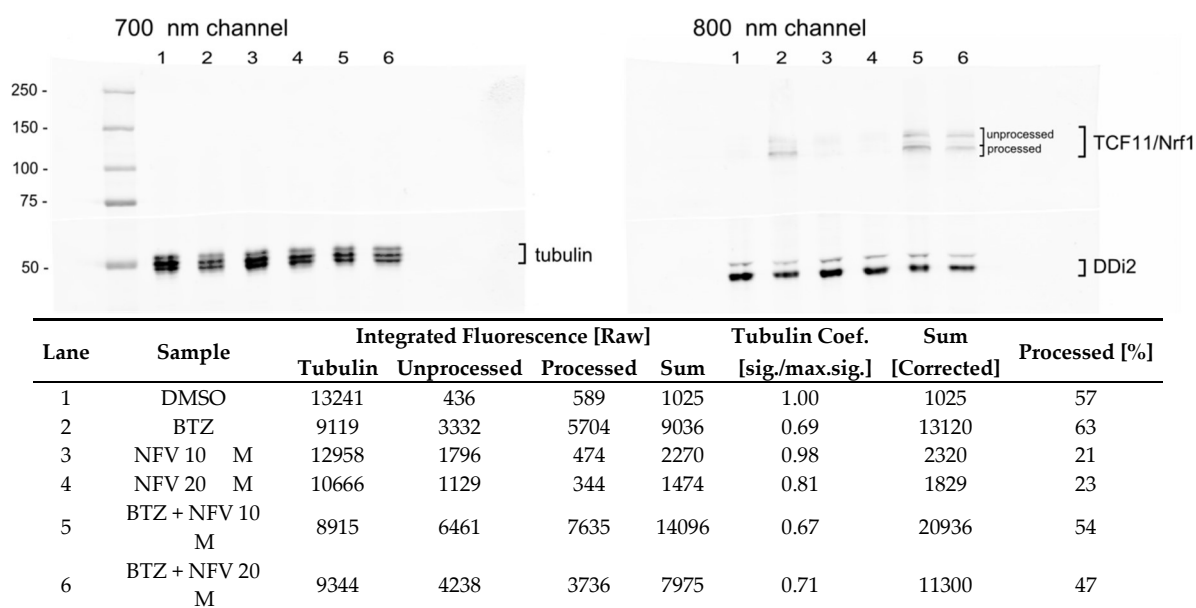

**Figure S6.** HEK293 cells were treated with 10  $\mu$ M or 20  $\mu$ M nelfinavir alone or in combination with 200 nM BTZ for 16 h. Cells were lysed and subjected to immunoblot analysis visualizing TCF11/Nrf1, DDI2 and tubulin as a loading control. Sixth independent experiment.

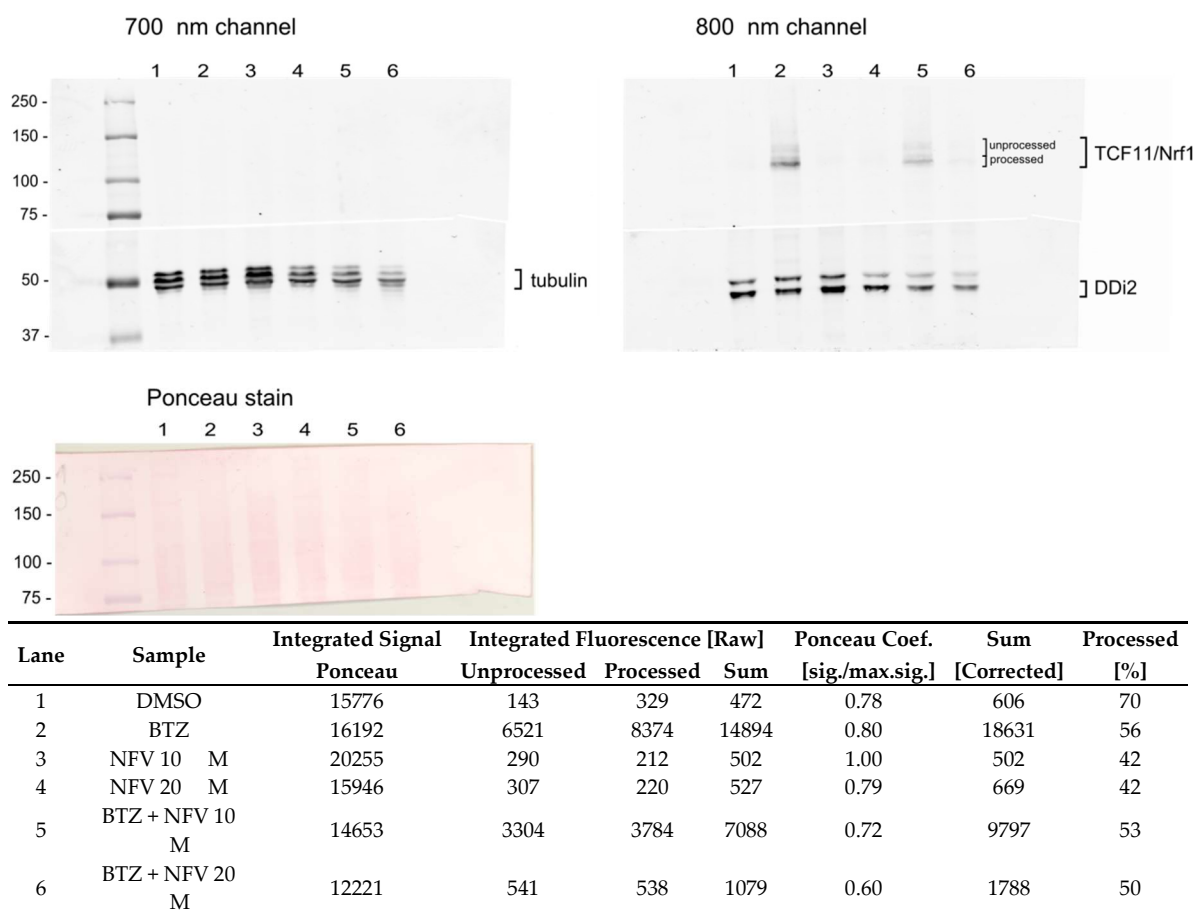

**Figure S7.** OPM-2 cells were treated with 10  $\mu$ M or 20  $\mu$ M nelfinavir alone or in combination with 20 nM BTZ for 16 h. Cells were lysed and subjected to immunoblot analysis visualizing TCF11/Nrf1 and DDI2. Ponceau staining was used as a loading control. First independent experiment.

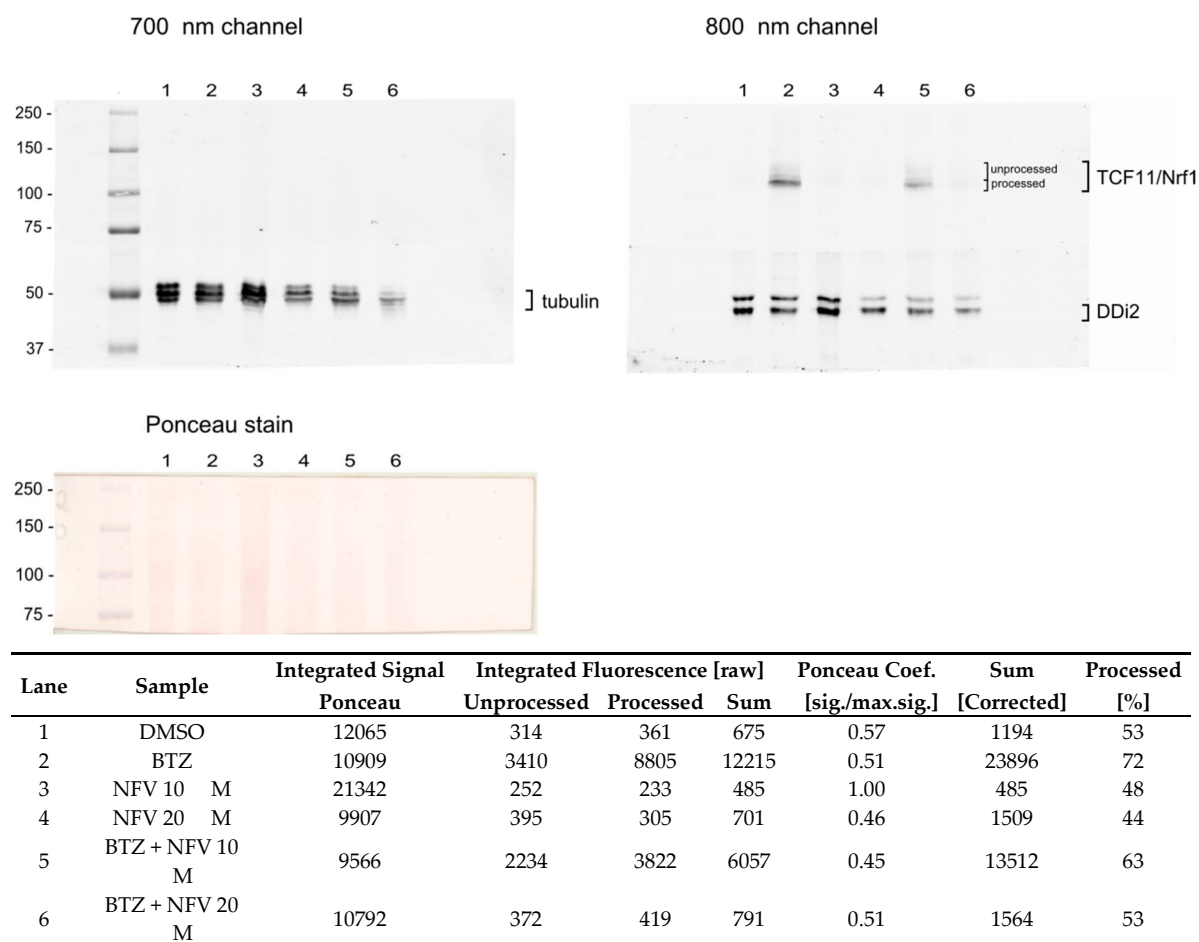

**Figure S8.** OPM-2 cells were treated with 10  $\mu$ M or 20  $\mu$ M nelfinavir alone or in combination with 20 nM BTZ for 16 h. Cells were lysed and subjected to immunoblot analysis visualizing TCF11/Nrf1 and DDi2. Ponceau staining was used as a loading control. Second independent experiment.

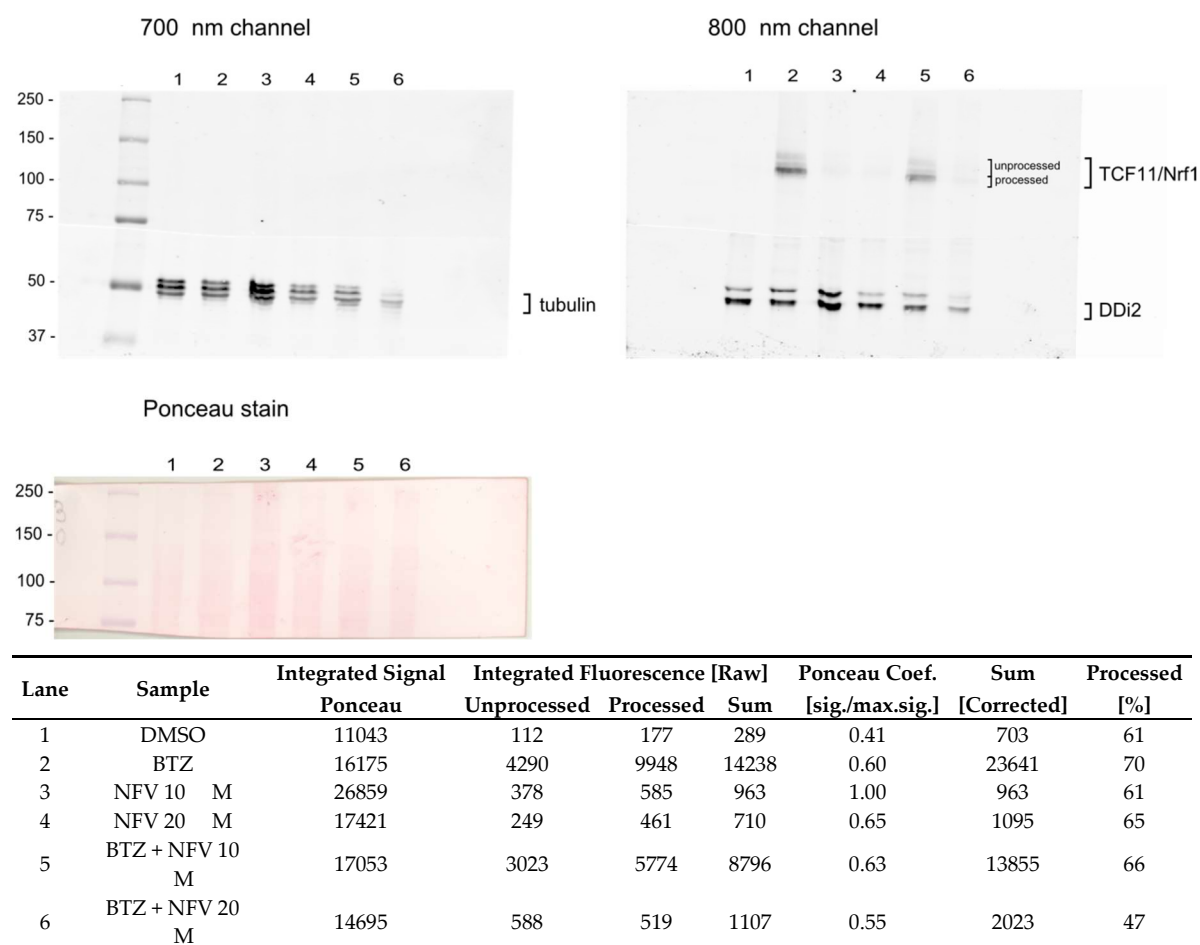

**Figure S9.** OPM-2 cells were treated with 10  $\mu$ M or 20  $\mu$ M nelfinavir alone or in combination with 20 nM BTZ for 16 h. Cells were lysed and subjected to immunoblot analysis visualizing TCF11/Nrf1 and DDi2. Ponceau staining was used as a loading control. Third independent experiment.

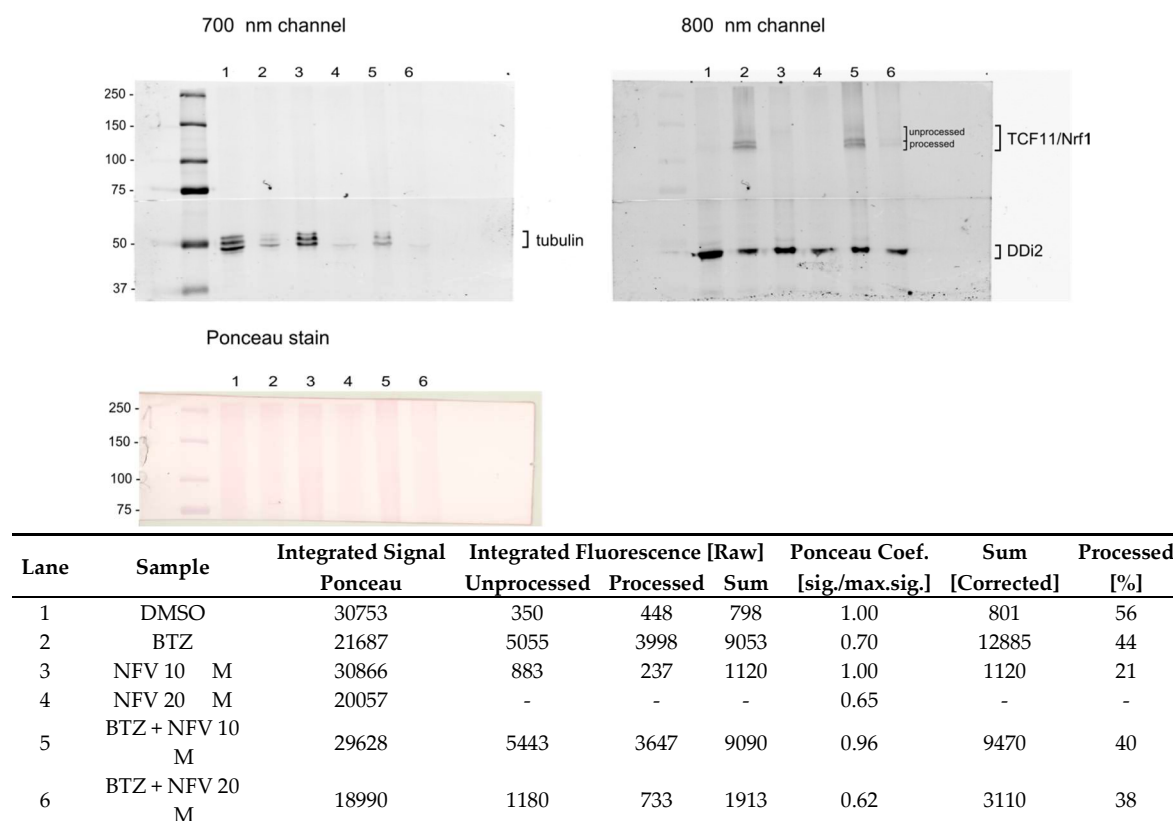

**Figure S10.** RPMI8226 cells were treated with 10  $\mu$ M or 20  $\mu$ M nelfinavir alone or in combination with 20 nM BTZ for 16 h. Cells were lysed and subjected to immunoblot analysis visualizing TCF11/Nrf1 and DDI2. Ponceau staining was used as a loading control. First independent experiment.

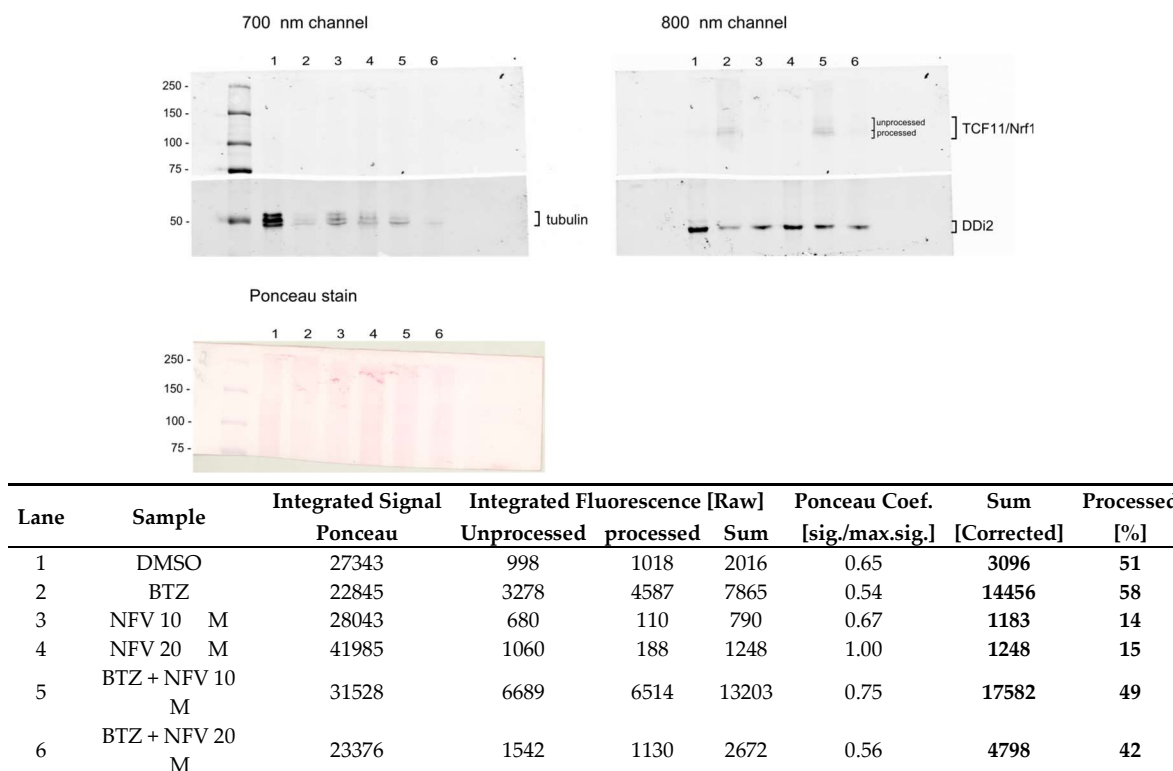

**Figure S11.** RPMI8226 cells were treated with 10  $\mu$ M or 20  $\mu$ M nelfinavir alone or in combination with 20 nM BTZ for 16 h. Cells were lysed and subjected to immunoblot analysis visualizing TCF11/Nrf1 and DDI2. Ponceau staining was used as a loading control. Second independent experiment.

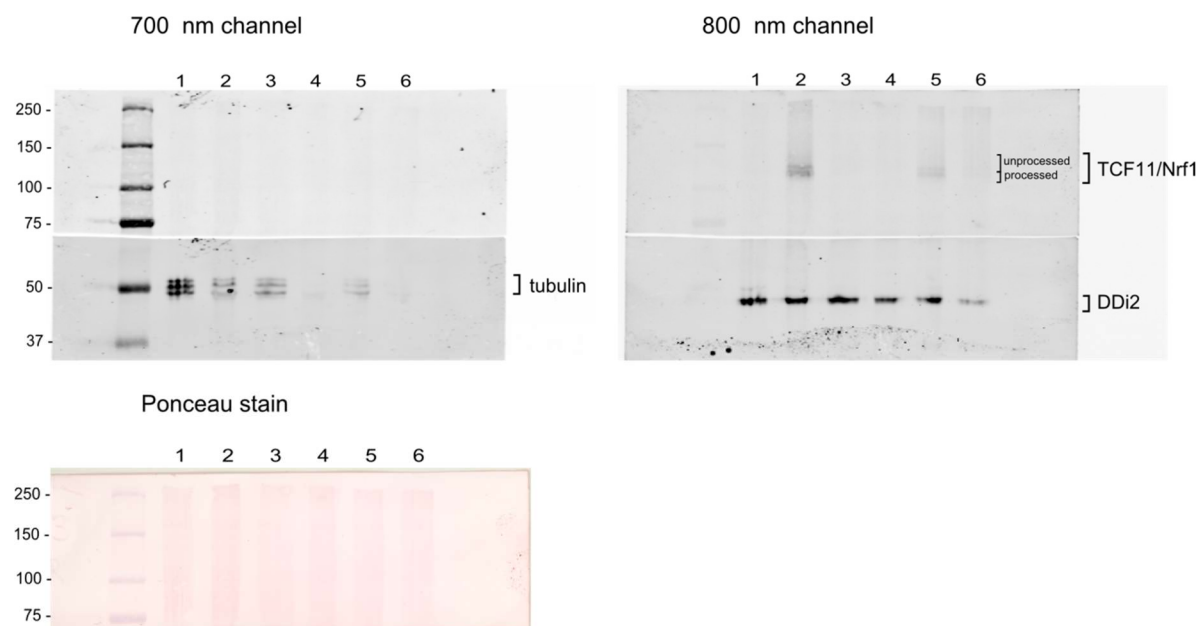

| Lane | Sample         | Integrated Signal | Integrated Fluorescence [Raw] |           |       | Ponceau Coef.   | Sum         | Processed |
|------|----------------|-------------------|-------------------------------|-----------|-------|-----------------|-------------|-----------|
|      |                | Ponceau           | Unprocessed                   | Processed | Sum   | [sig./max.sig.] | [Corrected] | [%]       |
| 1    | DMSO           | 25270             | -                             | -         | 764   | 0.93            | 824         | -         |
| 2    | BTZ            | 27245             | 7706                          | 7568      | 15274 | 1.00            | 15274       | 50        |
| 3    | NFV 10 M       | 16611             | -                             | -         | 662   | 0.61            | 1086        | -         |
| 4    | NFV 20 M       | 17584             | -                             | -         | 322   | 0.65            | 500         | -         |
| 5    | BTZ + NFV 10 M | 19316             | 2412                          | 2426      | 4838  | 0.71            | 6825        | 50        |
| 6    | BTZ + NFV 20 M | 21089             | 1021                          | 368       | 1389  | 0.77            | 1794        | 26        |

**Figure S12.** RPMI8226 cells were treated with 10  $\mu$ M or 20  $\mu$ M nelfinavir alone or in combination with 20 nM BTZ for 16 h. Cells were lysed and subjected to immunoblot analysis visualizing TCF11/Nrf1 and DDi2. Ponceau staining was used as a loading control. Third independent experiment.

#### *Does NFV Activates Nrf2 Pathway and Does It Have an Effect on Proteasome Re-Synthesis When Nrf1 Pathway Is Impaired?*

To evaluate our working hypothesis that NFV, by activation of the ER and oxidative stress, activates also Nrf2 pathway, we performed RT-qPCR analysis of HEK293 cells, where we knocked down NRF2 and further co-treated them with BTZ and nelfinavir (Figure S13). The mRNA levels of the inspected proteasome genes significantly decreased when NRF2 was downregulated compared to BTZ and NFV co-treated cells, but similar decrease was also observed with mock siRNA. Nevertheless, there is a decreasing tendency of the proteasome subunits mRNA levels, when comparing NRF2siRNA+BTZ+NFV and mocksiRNA+BTZ+NFV. This phenomenon will be inspected in the future.

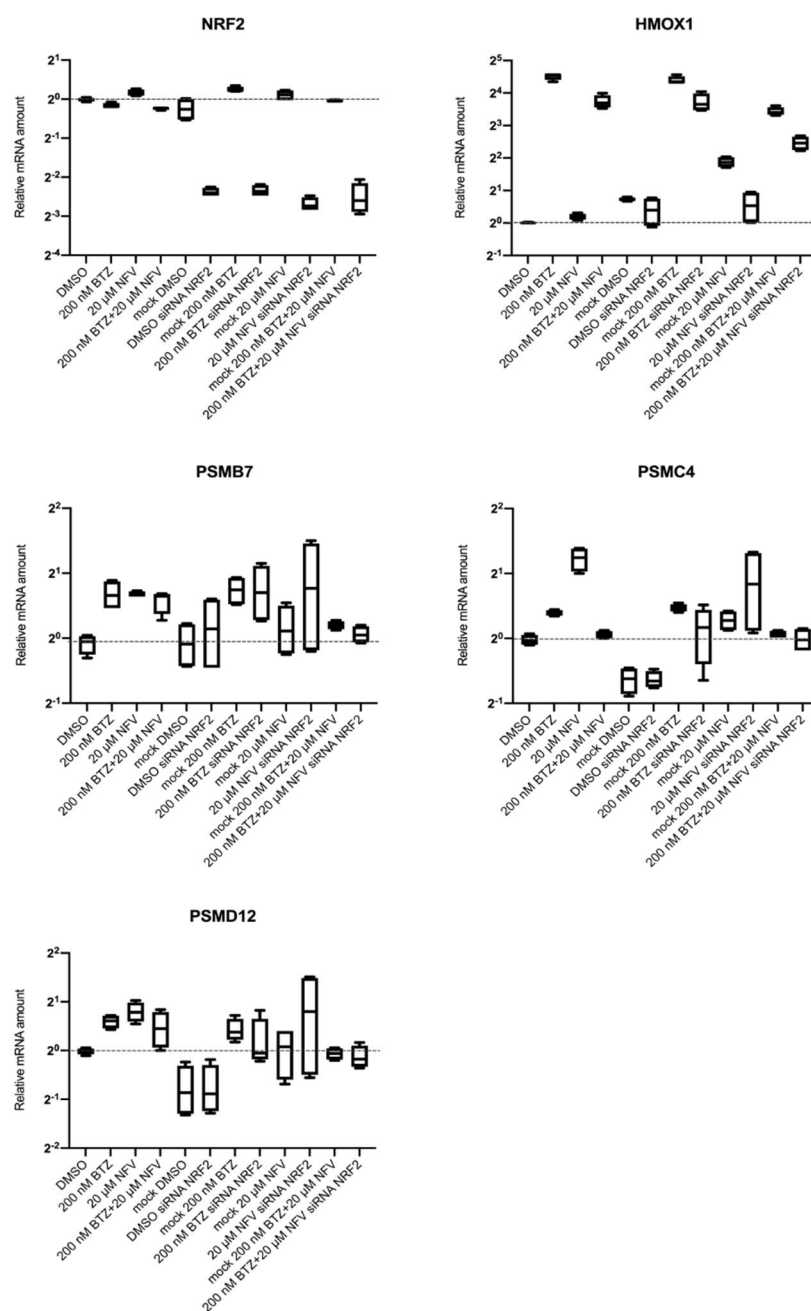

**Figure S13.** Quantitative RT-PCR analyses of the indicated genes are shown. NRF2 was downregulated in HEK293 cells by transfecting siRNA targeting NRF2 (sc-37030, Santa Cruz Biotechnology) using RNAiMAX (Invitrogen) and after 24h the cells were co-treated with 200 nM BTZ, and 20  $\mu$ M NFV, for 16 h. Respective controls are indicated. RNA extracted from the cells was converted to cDNA and used for RT-qPCR with the primers listed in Table S1. mRNA levels of *GAPDH* were used for normalization. The boxes indicate interquartile ranges, while whiskers denote minimal and maximal values ( $n = 4$ ).

**Table S1.** RT-qPCR primers used in the study.

| <b>Primer</b> | <b>Sequence (5'-3')</b>    |
|---------------|----------------------------|
| DDI2-F        | CTCCGAGGTGACCTTTTCCC       |
| DDI2-R        | CTGTGAGAGGTCTTTCCGCA       |
| GAPDH-F       | AATCCCATCACCATCTTCCA       |
| GAPDH-R       | TGGACTCCACGACGTACTCA       |
| HMOX-1-F      | ATGACACCAAGGACCAGAGC       |
| HMOX-1-R      | GTGTAAGGACCCATCGGAGA       |
| NFE2L1-F      | GCCCTGTTTCACTTATAGGGTCTAGA |
| NFE2L1-R      | GGCAAAGAGAACATTTAGCAGCTT   |
| NFE2L2-F      | AGCGACGGAAAGAGTATGA        |
| NFE2L2-R      | TGGGCAACCTGGGAGTAG         |
| POMP-F        | GTGCAGCAGGTTTACGCTCT       |
| POMP-R        | TGTGGCTCTCCCATGACTTCGC     |
| PSMA7-F       | CTGTGCTTTGGATGACAACG       |
| PSMA7-R       | CGATGTAGCGGGTGTGTACT       |
| PSMB7-F       | TGCAAAGAGGGGATACAAGC       |
| PSMB7-R       | GCAACAACCATCCCTTCAGT       |
| PSMC4-F       | GGAAGACCATGTTGGCAAAG       |
| PSMC4-R       | AAGATGATGGCAGGTGCATT       |
| PSMD12-F      | GTGCGCGACTGACTAAAACA       |
| PSMD12-R      | TAGGCAGAGCCTCATTTGCT       |

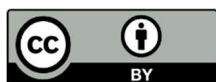

© 2020 by the authors. Licensee MDPI, Basel, Switzerland. This article is an open access article distributed under the terms and conditions of the Creative Commons Attribution (CC BY) license (<http://creativecommons.org/licenses/by/4.0/>).
